# Supplementary material for: Metabolic Signatures of Gestational Weight Gain and Postpartum Weight Loss in a Lifestyle Intervention Study of Overweight and Obese Women
Source: PubMed Central journal article supplement (PMC7761920; doi:10.3390/metabo10120498), 2020-12-04
Supplement: metabolites-10-00498-s001.pdf [file metabolites-10-00498-s001.pdf]

# Metabolic Signatures of Gestational Weight Gain and Postpartum Weight Loss in a Lifestyle Intervention Study of Overweight and Obese Women

Chung-Ho E. Lau <sup>1,2,\*</sup>, Victoria Taylor-Bateman <sup>1,3</sup>, Panagiotis A. Vorkas <sup>4,5</sup>, Gonçalo Graça <sup>6</sup>, Thanh-Huyen T. Vu <sup>7</sup>, Lifang Hou <sup>7</sup>, Elena Chekmeneva <sup>8</sup>, Timothy M. D. Ebbels <sup>6</sup>, Queenie Chan <sup>2,9</sup>, Linda Van Horn <sup>7,†</sup> and Elaine Holmes <sup>1,10,\*,†</sup>

<sup>1</sup> Section of Nutrition, Department of Metabolism, Digestion and Reproduction, Imperial College London, London, SW7 2AZ, UK;

<sup>2</sup> Department of Epidemiology and Biostatistics, School of Public Health, Imperial College London, London, W2 1PG, UK; [q.chan@imperial.ac.uk](mailto:q.chan@imperial.ac.uk)

<sup>3</sup> William Harvey Research Institute, Barts and The London School of Medicine and Dentistry, Queen Mary University of London, London, EC1M 6BQ, UK; [v.j.taylor-bateman@qmul.ac.uk](mailto:v.j.taylor-bateman@qmul.ac.uk)

<sup>4</sup> Section of Biomolecular Medicine, Department of Metabolism, Digestion and Reproduction, Imperial College London, London, SW7 2AZ, UK; [p.vorkas@imperial.ac.uk](mailto:p.vorkas@imperial.ac.uk)

<sup>5</sup> Institute of Applied Biosciences, Centre for Research and Technology Hellas, 57001 Thessaloniki, Greece

<sup>6</sup> Section of Bioinformatics, Department of Metabolism, Digestion and Reproduction, Imperial College London, London, SW7 2AZ, UK; [g.gomes-da-graca@imperial.ac.uk](mailto:g.gomes-da-graca@imperial.ac.uk) (G.G.); [t.ebbels@imperial.ac.uk](mailto:t.ebbels@imperial.ac.uk) (T.M.D.E.)

<sup>7</sup> Department of Preventive Medicine, Feinberg School of Medicine, Northwestern University, Chicago, IL, 60611, USA; [huyenvu@northwestern.edu](mailto:huyenvu@northwestern.edu) (T.-H.T.V.); [l-hou@northwestern.edu](mailto:l-hou@northwestern.edu) (L.H.); [lvanhorn@northwestern.edu](mailto:lvanhorn@northwestern.edu) (L.V.H.)

<sup>8</sup> National Phenome Centre and Section of Bioanalytical Chemistry, Department of Metabolism, Digestion and Reproduction, Imperial College London, Hammersmith Campus, IRDB Building, London, W12 0NN, UK

<sup>9</sup> MRC Centre for Environment and Health, Imperial College London, London, W2 1PG, UK

<sup>10</sup> Centre for Computational and Systems Medicine, Health Futures Institute, Murdoch University, Perth, WA, 6150, Australia

\* Correspondence: [chungho.lau@imperial.ac.uk](mailto:chungho.lau@imperial.ac.uk) (C.-H.E.L.); [elaine.holmes@murdoch.edu.au](mailto:elaine.holmes@murdoch.edu.au) (E.H.)

† Joint Senior Authors.

Received: 2 November 2020; Accepted: 1 December 2020; Published: date

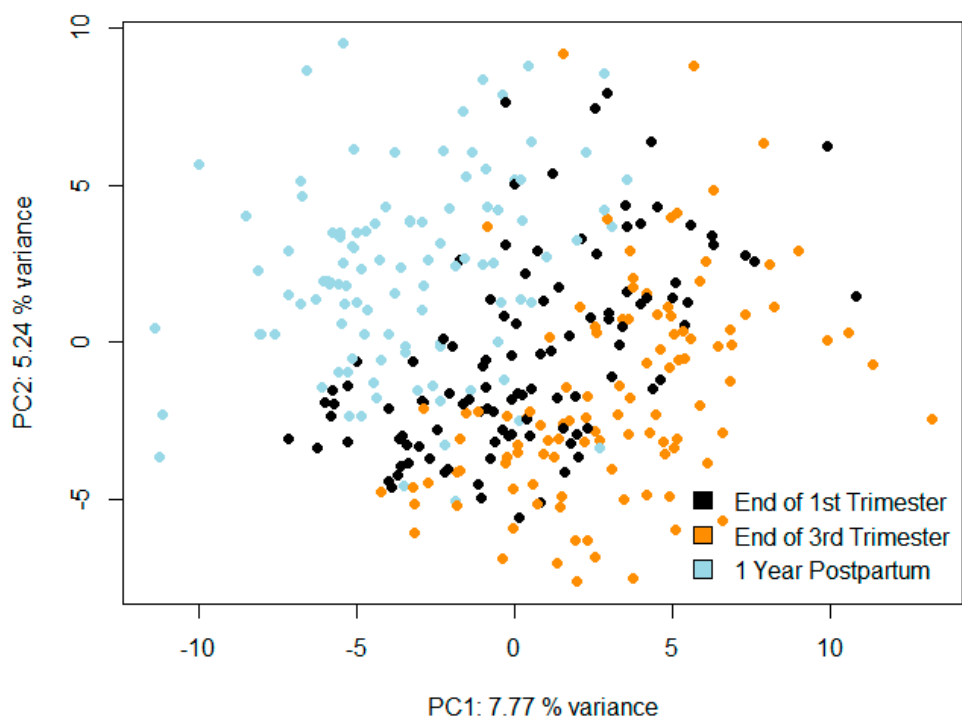

Supplementary Figure S1 Principal Component Analysis of NMR urine samples.

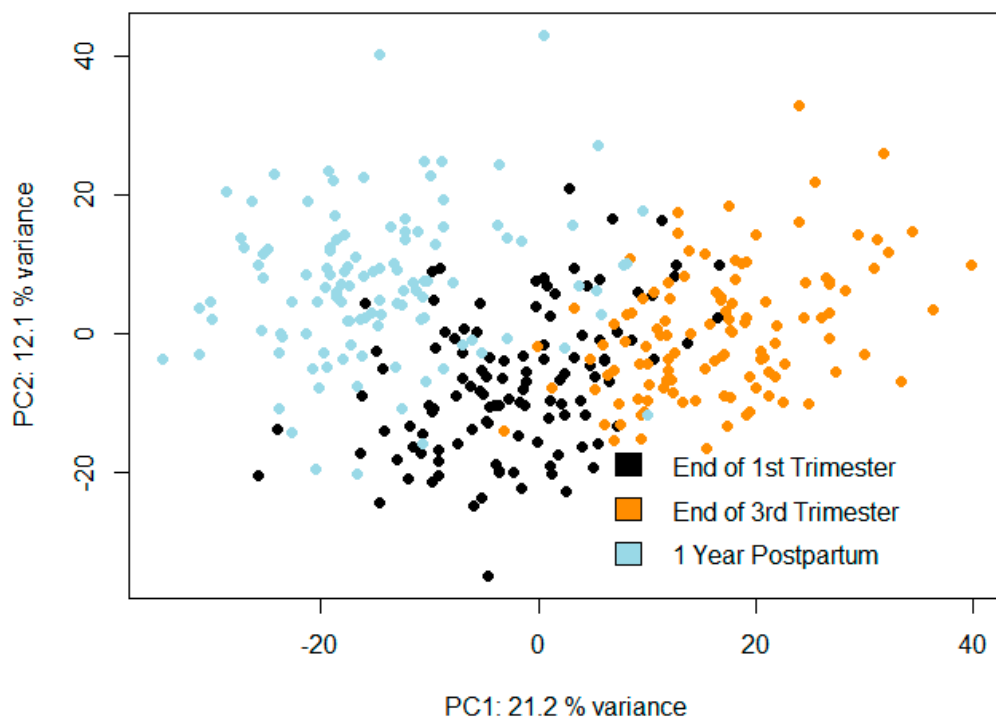

Supplementary Figure S2 Principal Component Analysis of LC-MS plasma samples.

Supplementary Table S1 Details of Lipid annotations.

| Lipid              | RT(min) | m/z     | Annotation        | Confidence of Annotation |
|--------------------|---------|---------|-------------------|--------------------------|
| LPS(O-18:0)        | 1.64    | 512.34  | [M+H]             | Match by accurate mass   |
| LPC(22:6)          | 1.73    | 568.34  | [M+H]             | MS/MS (DDA)              |
| LPC(20:4)          | 1.80    | 545.34  | [M+1+H]           | MS/MS (DDA)              |
| LPC(18:2)          | 1.80    | 520.34  | [M+H]             | MS/MS (DDA)              |
| LPE(16:0)          | 2.08    | 454.29  | [M+H]             | MS/MS (DDA)              |
| LPC(18:1)          | 2.18    | 522.36  | [M+H]             | MS/MS (DDA)              |
| LPC(O-16:0)        | 2.27    | 483.36  | [M+H]             | MS/MS (DDA)              |
| LPC(O-16:1)        | 2.27    | 481.35  | [M+H]             | MS/MS (DDA)              |
| LPC(17:0)          | 2.30    | 510.36  | [M+H]             | MS/MS (DDA)              |
| LPC(O-18:1)        | 2.41    | 508.38  | [M+H]             | MS/MS (DDA)              |
| LPC(O-18:0)        | 2.88    | 510.39  | [M+H]             | MS/MS (DDA)              |
| SM(d30:1)          | 4.56    | 647.51  | [M+H]             | MS/MS (DDA)              |
| SM(d18:2/14:0)     | 4.69    | 674.53  | [M+1+H]           | MS/MS (DDA)              |
| PI(16:0_16:1)      | 5.05    | 549.49  | [M+H-260]         | MS/MS (DDA)              |
| PI(16:0_18:2)      | 5.21    | 857.51  | M+Na]             | MS/MS (DDA)              |
| PI(16:0_20:4)      | 5.22    | 859.53  | [M+H]             | MS/MS (DDA)              |
| SM(d18:2/16:0)     | 5.45    | 723.54  | M+Na]             | MS/MS (DDA)              |
| PC(30:1)           | 5.50    | 705.53  | [M+H]             | MS/MS (DDA)              |
| PI(32:0)           | 5.57    | 551.50  | [M+H-260]         | MS/MS (DDA)              |
| PC(14:0_18:2)      | 5.67    | 733.55  | [M+H+3]           | MS/MS (DDA)              |
| SM(d17:1/16:0)     | 5.67    | 416.36  | Unassigned adduct | Match by ion coelution   |
| PI(34:1)           | 5.74    | 577.52  | [M+H-260]         | MS/MS (DDA)              |
| PC(40:8)           | 5.76    | 1228.76 | Unassigned adduct | Match by ion coelution   |
| PC(16:1_18:2)      | 5.88    | 758.56  | [M+2+H]           | MS/MS (DDA)              |
| PI(18:0_20:2)      | 5.91    | 863.56  | [M+H]             | MS/MS (DDA)              |
| PC(15:0_18:2)      | 6.02    | 745.56  | [M+1+H]           | MS/MS (DDA)              |
| SM(d18:1/16:0)     | 6.04    | 763.63  | [M+CH3CN+NH4]     | MS/MS (DDA)              |
| PC(42:6)           | 6.07    | 844.61  | [M+H-H2O]         | MS/MS (DDA)              |
| PC(16:0_16:1)      | 6.22    | 733.56  | [M+1+H]           | MS/MS (DDA)              |
| PC(16:0_22:5)      | 6.33    | 1491.12 | Unassigned adduct | Match by ion coelution   |
| PC(16:0_20:4)      | 6.35    | 1945.41 | Unassigned adduct | Match by ion coelution   |
| PC(17:0_22:6)      | 6.50    | 820.58  | [M+H]             | MS/MS (DDA)              |
| PE(34:2)           | 6.50    | 716.52  | [M+H]             | MS/MS (DDA)              |
| PC(18:1_18:2)      | 6.58    | 1960.95 | Unassigned adduct | Match by ion coelution   |
| PC(16:0_22:4)      | 6.81    | 596.57  | Unassigned adduct | Match by ion coelution   |
| PC(O-18:1_20:4)    | 6.88    | 795.61  | [M+H]             | MS/MS (DDA)              |
| PC(16:0_18:1)      | 6.91    | 820.63  | Unassigned adduct | Match by ion coelution   |
| PC(18:0_18:2)      | 7.08    | 786.75  | [M+H]             | MS/MS (DDA)              |
| PC(O-18:1_20:3)    | 7.22    | 818.60  | M+Na]             | MS/MS (DDA)              |
| PC(15:0_20:1)      | 7.25    | 774.60  | [M+H]             | Match by accurate mass   |
| PC(O-16:0_22:4)    | 7.25    | 796.62  | [M+H]             | Match by accurate mass   |
| PC(18:0_20:3)      | 7.28    | 813.62  | [M+H]             | MS/MS (DDA)              |
| PC(O-18:1_16:0)    | 7.33    | 746.60  | [M+H]             | Match by accurate mass   |
| PE(O-20:0_22:6)    | 7.33    | 776.56  | [M+H]             | MS/MS (DDA)              |
| PC(O-18:1_18:2)    | 7.45    | 770.60  | [M+H]             | MS/MS (DDA)              |
| DG(18:1_18:2)      | 7.61    | 601.52  | [M+H-H2O]         | MS/MS (DDA)              |
| SM(d18:2/24:1)     | 7.66    | 811.67  | [M+H]             | MS/MS (DDA)              |
| PC(18:0_22:4)      | 7.76    | 838.63  | [M+H]             | MS/MS (DDA)              |
| SM(d17:1/24:1)     | 7.89    | 831.69  | Unassigned adduct | Match by ion coelution   |
| DG(34:1)           | 7.99    | 617.51  | [M+Na]            | MS/MS (DDA)              |
| DG(36:2)           | 8.09    | 603.53  | [M+H-H2O]         | MS/MS (DDA)              |
| PC(O-22:1_18:1)    | 8.14    | 851.67  | M+1+Na]           | Match by accurate mass   |
| SM(d18:1/24:1)     | 8.16    | 933.64  | [M+H2PO4+Na+H]    | MS/MS (DDA)              |
| PC(O-20:0_20:4)    | 8.16    | 826.66  | [M+H]             | MS/MS (DDA)              |
| PC(O-24:2_20:4)    | 8.24    | 876.68  | [M+H]             | Match by accurate mass   |
| PC(O-24:1_20:4)    | 8.72    | 879.70  | [M+1+H]           | MS/MS (DDA)              |
| HexCer(d18:1/24:0) | 8.91    | 812.70  | [M+H]             | MS/MS (DDA)              |
